# Supplementary material for: VolumePeeler: a novel FIJI plugin for geometric tissue peeling to improve visualization and quantification of 3D image stacks
Source: Springer Nature journal article supplement (doi:10.1186/s12859-023-05403-z), 2023-07-12
Supplement: 12859_2023_5403_MOESM1_ESM.pdf [file 12859_2023_5403_MOESM1_ESM.pdf]

# Supplementary Material for “VolumePeeler: A novel FIJI plugin for geometric tissue peeling to improve visualization and quantification of 3D image stacks”

Marilyn Gatica<sup>1</sup>, Carlos F. Navarro<sup>2,3</sup>, Alejandro Lavado<sup>2,3</sup>, Germán Reig<sup>4</sup>, Eduardo Pulgar<sup>5</sup>, Paula Llanos<sup>6</sup>, Steffen Härtel<sup>2,3,7</sup>, Andrea Ravasio<sup>8</sup>, Cristina Bertocchi<sup>9</sup>, Miguel L. Concha<sup>2,3,10</sup>, and Mauricio Cerda<sup>2,3,7,10,\*</sup>

<sup>1</sup>*NIHR Nottingham Biomedical Research Centre, School of Medicine, University of Nottingham, Nottingham, United Kingdom.*

<sup>2</sup>*Integrative Biology Program, Institute of Biomedical Sciences, Facultad de Medicina, Universidad de Chile.*

<sup>3</sup>*Biomedical Neuroscience Institute, Santiago, Chile.*

<sup>4</sup>*Escuela de Tecnología Médica and Centro Integrativo de Biología y Química Aplicada, Universidad Bernardo O’Higgins, Santiago, Chile.*

<sup>5</sup>*CEDAI Aquaculture, Santiago, Chile.*

<sup>6</sup>*Facultad de Ingeniería y Ciencias, Universidad Adolfo Ibañez, Viña del Mar, Chile.*

<sup>7</sup>*Center for Medical Informatics and Telemedicine, Facultad de Medicina, Universidad de Chile, Santiago, Chile.*

<sup>8</sup>*Institute for Biological and Medical Engineering, Schools of Engineering, Medicine and Biological Sciences, Pontificia Universidad Católica de Chile, Santiago, Chile.*

<sup>9</sup>*Laboratory for Molecular Mechanics of Cell Adhesion, Department of Physiology, Faculty of Biological Sciences, Pontificia Universidad Católica de Chile, Santiago, Chile.*

<sup>10</sup>*Center for Geroscience, Brain Health and Metabolism, Santiago, Chile.*

\* *Corresponding author: Mauricio Cerda, mauricio.cerda@uchile.cl*

## Contents

|          |                                                                |          |
|----------|----------------------------------------------------------------|----------|
| <b>1</b> | <b>Supplementary Note 1. Image acquisition.</b>                | <b>2</b> |
| <b>2</b> | <b>Supplementary Note 2. Spline projection User Interface.</b> | <b>2</b> |
| <b>3</b> | <b>Supplementary Figures.</b>                                  | <b>3</b> |

## 1 Supplementary Note 1. Image acquisition.

Annual killifish embryos (*Austrolebias nigripinnis*) expressing GAP43-EGFP were mounted in a custom-designed chamber filled with dissolved 1% low-melting-point agarose in ERM rearing medium and placed on the microscope stage, between 48 and 72 hours post-fertilization. Zebrafish (*Danio rerio*) wild-type AB embryos injected with 50 pg of gap43-RFP mRNA were mounted in 0.5% low melting point agarose in a custom-designed chamber at 50% epiboly stage. *In vivo* confocal microscopy was performed in a Leica TCS LSI microscope (Leica Microsystems, Germany) using a 5x objective for killifish and zebrafish embryo. *Marchantia* of expressing GFP-MpTUB1 and Lit6b-mCitrin transgenic lines were mounted in a custom chamber with Gambor B5 agar media. Microscopy was performed using a Leica SP8 upright microscope (Leica Microsystems, Germany) equipped with a 40x objective.

## 2 Supplementary Note 2. Spline projection User Interface.

The interface for spline projection has several features that allow for an efficient and user-friendly experience, as shown in Supplementary Figure 3. To summarize, the interface allows: 3x3, 4x4, or 5x5 control points and channel selection, save/load z-values, repeat z-values, interpolate z-values, selection of peeling behavior (upper, lower, band), and visualization options (preview, process, adjust brightness).

### 3 Supplementary Figures.

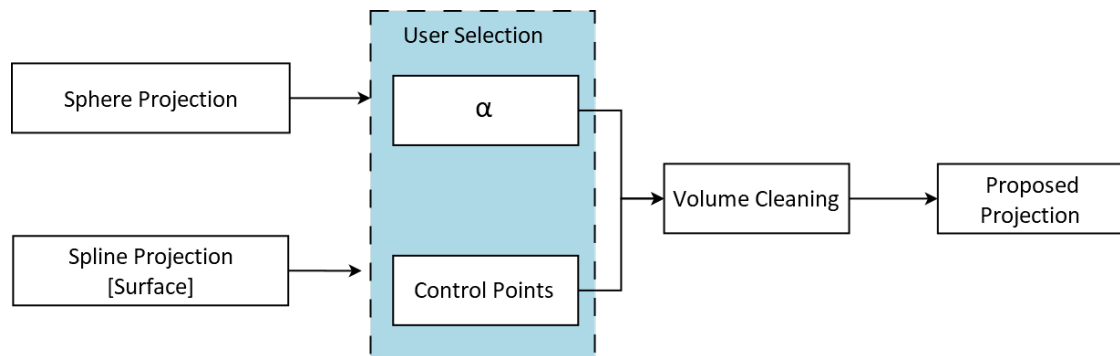

Supplementary Figure 1: Block diagram of the VolumePeeler approach.

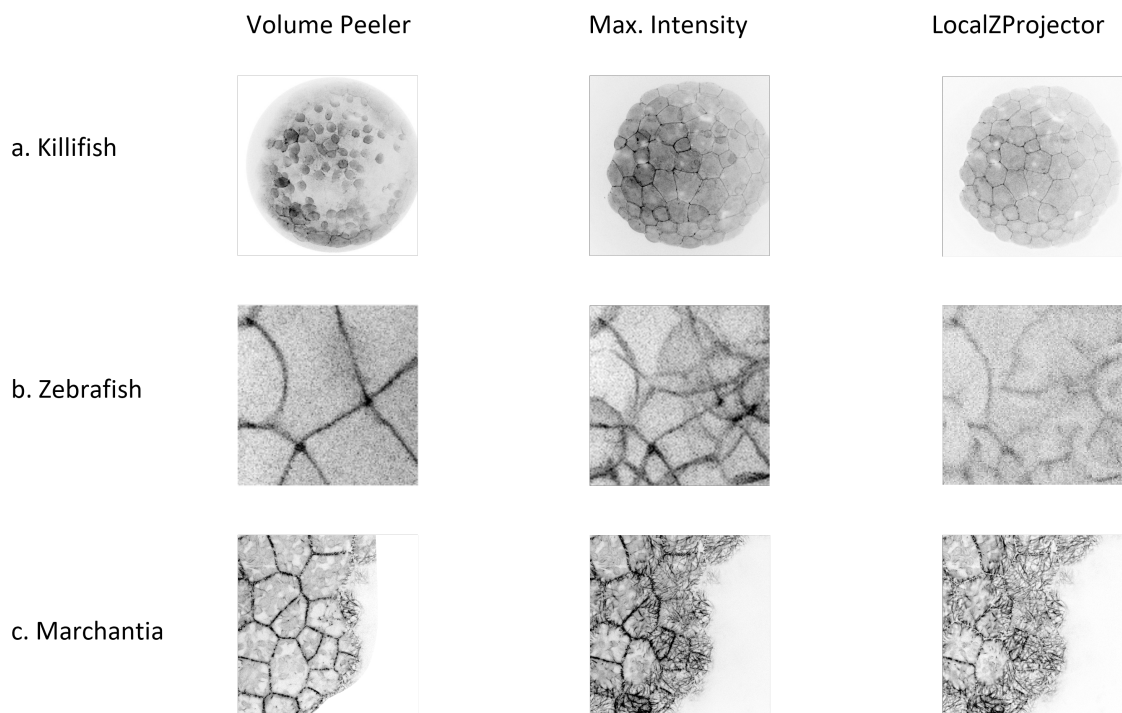

Supplementary Figure 2: Visual comparison of VolumePeeler (proposed approach), Maximum Intensity Projection, and LocalZProjector, for three biological model examples: **a** killifish, **b** zebrafish, **c** *Marchantia*.

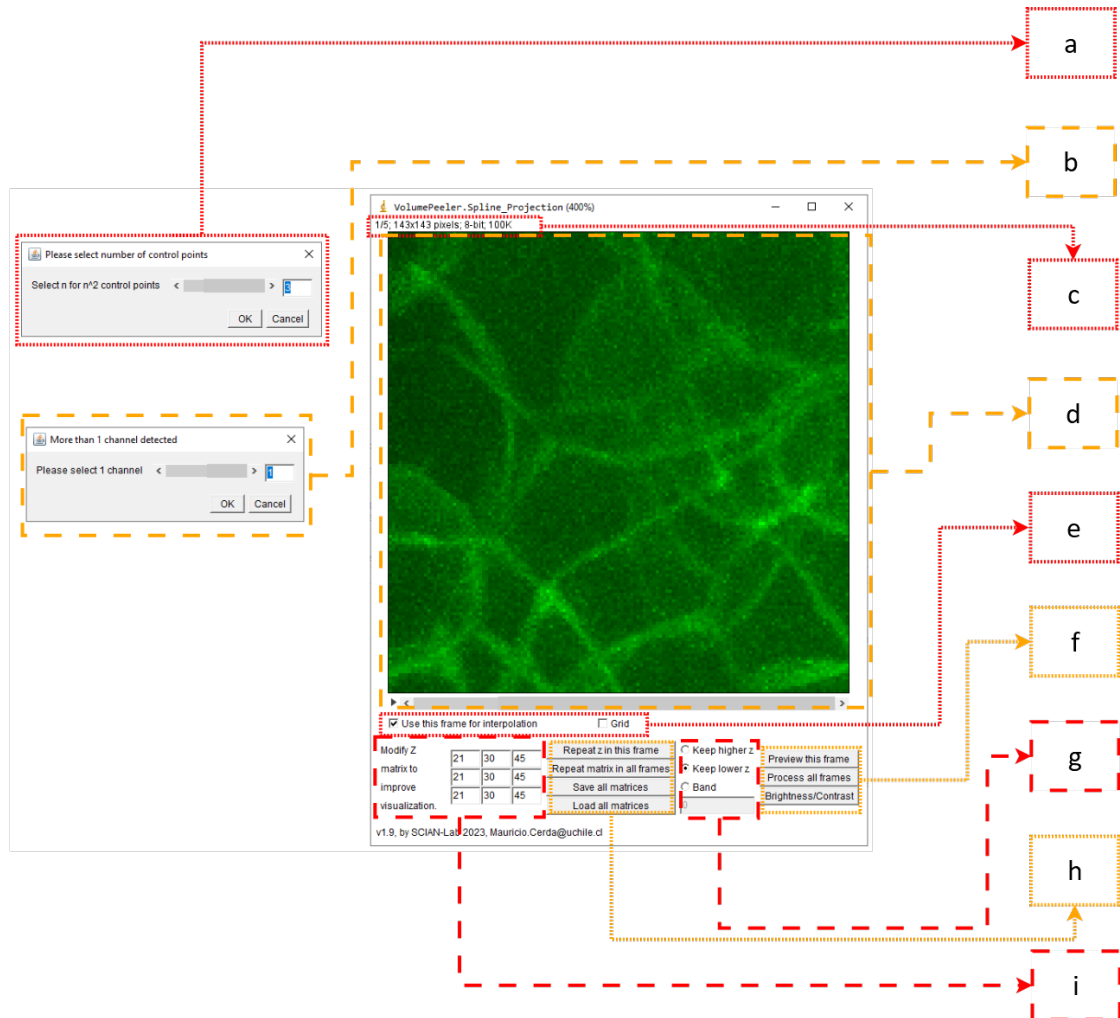

Supplementary Figure 3: Spline projection user interface. **a** Selector for number of control points. **b** Selector of working channel. **c** Stack information label. **d** Preview window. **e** Frame selection option for interpolation and grid lines (on/off) control. **f** Preview, process, and brightness/contrast control buttons. **g** Volume peeling behavior selector. **h** Shortcut buttons for cloning and saving/loading values and matrices. **i** Depth matrix control points to define the reference surface.
